# Supplementary material for: Global loss of fine-scale chromatin architecture and rebalancing of gene expression during early colorectal cancer development
Source: Research Square preprint supplement (doi:10.21203/rs.3.rs-2003187/v1), 2022-09-14
Supplement: Supplementary file 1 [file 612ee69c60c75f0ee740b3ea.xlsx]

## Sheet: Sheet4
Housekeeping			Immune			Stroma			Epithelial
Gene symbol	Entrez		Gene symbol	Entrez		Gene symbol	Entrez		Gene symbol	Entrez
ACTB	ENSG00000075624		CD19	ENSG00000177455		PECAM1	ENSG00000261371		OLFM4	ENSG00000102837
GAPDH	ENSG00000111640		CR2	ENSG00000117322		KIT	ENSG00000157404		BMI1	ENSG00000168283
PGK1	ENSG00000102144		CD3G	ENSG00000160654		PDPN	ENSG00000162493		LGR5	ENSG00000139292
PPIA	ENSG00000196262		CD4	ENSG00000010610		SYP	ENSG00000102003		CDH17	ENSG00000079112
RPL13A	ENSG00000142541		CD8A	ENSG00000153563		ACTA2	ENSG00000107796		PDX1	ENSG00000139515
RPLP0	ENSG00000089157		ITGAX	ENSG00000140678		VIM	ENSG00000026025		MUC2	ENSG00000198788
B2M	ENSG00000166710		MRC1	ENSG00000260314		COL6A2	ENSG00000142173		AGR2	ENSG00000106541
YWHAZ	ENSG00000164924		FUT4	ENSG00000196371		MYH11	ENSG00000133392		BEST4	ENSG00000142959
SDHA	ENSG00000073578		BCL2	ENSG00000171791		THY1	ENSG00000154096		CLDN4	ENSG00000189143
TFRC	ENSG00000072274		CD244	ENSG00000122223		WNT5B	ENSG00000111186		CHGA	ENSG00000100604
GUSB	ENSG00000169919		CD63	ENSG00000135404		RSPO3	ENSG00000146374		BMX	ENSG00000102010
HMBS	ENSG00000256269		FOXP3	ENSG00000049768		WNT2	ENSG00000105989		CDX2	ENSG00000165556
HPRT1	ENSG00000165704		CTLA4	ENSG00000163599		PDGFRB	ENSG00000113721		KRT18	ENSG00000111057
TBP	ENSG00000112592
